# Supplementary material
Source: publisher site journal article supplement (https://www.dovepress.com/article/445025)
Supplement: Supplementary file 1 [file get_supplementary_file.php]

Supplemental table 1. Postoperative cardiac complications

| Variables | N | Percentage |
| --- | --- | --- |
| Total | 21 | 20.6% |
| Low cardiac output | 16 | 15.7% |
| Atrial fibrillation | 5 | 4.9% |
| Ventricular fibrillation | 1 | 1.0% |

Supplemental table 2. The analysis of perioperative characteristics predicting cardiac complications

| Variables | Cardiac complications | | P value | Multivariate analysis | | |
| --- | --- | --- | --- | --- | --- | --- |
| No (N=81) | Yes (N=21) | OR | 95%CI | P value |
| Gender  Male  Female | 66 (81.5%)  15 (18.5%) | 18 (85.7%)  3 (14.3%) | 0.895 |  |  |  |
| Age, years | 59 (16-79) | 71 (17-83) | 0.010 | 1.058 | 1.009-1.110 | 0.021 |
| Symptom  Chest distress | 66 (81.5) | 18 (85.7%) | 0.895 |  |  |  |
| Other | 15 (18.5%) | 3 (14.3%) |  |  |  |  |
| Duration of symptom, months | 2.0 (0.3-18.0) | 2.0 (0.5-12.0) | 0.918 |  |  |  |
| Pulmonary TB | 19 (23.5%) | 6 (28.6%) | 0.627 |  |  |  |
| Duration of anti-TB, months | 1.5 (0-15.0) | 2.0 (0.2-4.7) | 0.455 |  |  |  |
| A-TCP | 14 (17.3%) | 10 (47.6%) | 0.008 | 4.231 | 1.317-13.593 | 0.015 |
| Preoperative NYHA functional class |  |  | 0.017 | 1.497 | 0.605-3.700 | 0.383 |
| Ⅰ | 3 (3.7%) | 1 (4.8%) |  |  |  |  |
| Ⅱ | 41 (50.6%) | 8 (38.1%) |  |  |  |  |
| Ⅲ | 37 (45.7%) | 9 (42.9%) |  |  |  |  |
| Ⅳ | 0 (0%) | 3 (14.3%) |  |  |  |  |
| Hypertension | 16 (19.8%) | 3 (14.3%) | 0.796 |  |  |  |
| Diabetes | 9 (11.1%) | 1 (4.8%) | 0.645 |  |  |  |
| Atrial fibrillation | 12 (14.8%) | 5 (23.8%) | 0.511 |  |  |  |
| COPD | 3 (3.7%) | 0 (0%) | 1.000 |  |  |  |
| HIV | 0 (0%) | 0 (0%) | / |  |  |  |
| BMI, kg/m2 | 21.6 (14.9-33.1) | 21.12 (16.5-26.9) | 0.371 |  |  |  |
| SBP, mmHg | 113 (82-167) | 110 (90-139) | 0.580 |  |  |  |
| DBP, mmHg | 76 (45-110) | 74 (51-97) | 0.405 |  |  |  |
| Pulse rate (beats/min) | 100 (62-145) | 98 (75-124) | 0.455 |  |  |  |
| Preoperative CVP, cmH2O | 26.0 (13.0-40.0) | 28.0 (20.0-39.0) | 0.028 | 1.159 | 1.035-1.298 | 0.011 |
| Pericardial calcification | 16 (19.8%) | 7 (33.3%) | 0.301 |  |  |  |
| Pericardial thickness, mm | 10.0 (3.4-22.0) | 11 (6.0-19.0) | 0.234 |  |  |  |
| LVEF, % | 59.1 (42.0-78.0) | 56.0 (45.0-67.1) | 0.101 |  |  |  |
| CRP, mg/L | 20.1 (1.1-86.4) | 18.1 (3.1-62.1) | 0.840 |  |  |  |
| ESR, mm/h | 34.0 (2.0-120.0) | 38.0 (5.0-105.0) | 0.517 |  |  |  |
| Total protein, g/L | 64.4 (44.8-75.8) | 62.4 (50.8-78.5) | 0.809 |  |  |  |
| Albumin, g/L | 32.0 (21.9-42.2) | 30.0 (25.4-36.8) | 0.060 |  |  |  |
| Globulin, g/L | 31.3 (17.6-42.4) | 32.1 (22.3-45.4) | 0.332 |  |  |  |
| Total bilirubin, μmol/L | 13.9 (4.2-47.0) | 15.9 (9.1-92.2) | 0.108 |  |  |  |
| Direct bilirubin, μmol/L | 7.7 (2.7-38.0) | 10.8 (4.8-79.8) | 0.108 |  |  |  |
| Preoperative Ccr, ml/min | 74.8 (39.2-187.0) | 65.6 (36.5-105.3) | 0.321 |  |  |  |
| Operative duration, min | 250 (115-385) | 259 (200-390) | 0.141 |  |  |  |
| Blood loss, ml | 100 (50-700) | 100 (50-800) | 0.256 |  |  |  |
| Intraoperative blood transfusion, ml | 0 (0) | 0 (0) | / |  |  |  |

Values presented as N (percentage) for categorical variables and median (range) for continuous variables.

OR, odds ratio; CI, confidence interval; TB, tuberculosis; A-TCP, active tuberculous constrictive pericarditis; NYHA, New York Heart Association; BMI, body mass index; SBP, systolic blood pressure; DBP, diastolic blood pressure; CVP, central venous pressure; LVEF, left ventricular ejection fraction (measured on echocardiogram); CRP, C-reactive protein; ESR, erythrocyte sedimentation rate; Ccr, creatinine clearance rate
